# Supplementary material for: Variable Selection for Hidden Markov Models with Continuous Variables and Missing Data
Source: Springer Nature journal article supplement (doi:10.1007/s00357-023-09457-9), 2024-01-23
Supplement: MOESM1 [file 26656446]

Supplementary material for the paper  
VARIABLE SELECTION FOR HIDDEN MARKOV  
MODELS WITH CONTINUOUS VARIABLES AND  
MISSING DATA

Fulvia Pennoni<sup>1</sup>, Francesco Bartolucci<sup>2</sup>, Silvia Pandolfi<sup>2</sup>,

<sup>1</sup>Department of Statistics and Quantitative Methods,  
University of Milano-Bicocca, Via Bicocca degli Arcimboldi 8,  
20128 Milan, Italy

Email: fulvia.pennoni@unimib.it

<sup>2</sup>Department of Economics, University of Perugia,  
Via Alessandro Pascoli 20, 06123 Perugia, Italy  
Emails: francesco.bartolucci@unipg.it, silvia.pandolfi@unipg.it

## Illustrative application

Here, we provide additional details related to the longitudinal data employed for the applicative example of choosing the best indicators to classify countries according to their development.

In particular, Tables from 1 to 6 describe the 25 macroeconomic World Development Indicators reporting their definition provided by the World Bank<sup>1</sup>. Table 7 lists the names of all countries.

---

<sup>1</sup>For more details on the World Development Indicators see the webpage: <https://www.worldbank.org/en/home>

Figures from 1 to 4 depict the values of the indicators for each country provided from years 2000 to 2017. We notice intermittent missing responses (in black) for many countries, and that some countries do not provide data during the last periods; see, for example, school enrollment, primary, (Sch1), secondary (Sch2), and tertiary (Sch3) in Figure 1, as well as research and development expenditure (Rese) in Figure 2. The main information we can glean from these figures is as follows:

- the variables with larger intermittent missing values are: **Saf**, **Lit**, and **Gini**;
- the variables with missing values for all the countries in one or more years are: **Int**, **Ren**, **Saf**, **Ele**, and **Comb**;
- the variables remarkably heterogeneous between countries across years are the following: **Pop**, **GDP**, **Int**, **Ren**, **Hyd**, and **Fert**;
- some countries do not record data in any year for **Edu**;
- the variables with remarkably increasing values for many countries across years are **Ele** and **GDP**.

Summary statistics of some indicators are reported in Tables 8 and 9, referred to years 2000 and 2017, respectively. Comparing the observed values between 2000 and 2017, we notice that almost all the averages across countries are higher in 2017. The highest relative standard deviation is observed for **Int** in 2000 and for **GDP** and **Hea** in 2017. The largest number of missing values is observed for **Saf** and **Lit** in 2000, whereas as previously noticed, **Hea** and **Saf** are missing for each country in 2017. Due to the observed skewness, as expressed in the paper, before implementing the variable selection procedure, we applied a logit transformation if the variables are expressed in a percentage scale, a Box-Cox transformation (Box and Cox, 1964) to the other variables, and we scaled all the variables.

Table 10 shows the observed values for each indicator for eight selected countries (Afghanistan, Bhutan, Cambodia, Ethiopia, Nepal, Papua New Guinea, Solomon Islands, Timor-Leste) over the most recent time period and the overall median values across all countries. We observe that Nepal is characterized by particularly high values of **Gsav**, and **Sch1**, Timor-Leste by high **Imp** and **Trade** values, and Bhutan by high **Int**.

We also provide in Tables from 11 to 14 the estimated standard errors obtained with the non-parametric bootstrap (Davison and Hinkley, 1997), based on 300 samples, for the transition probabilities reported in the main article in Tables from 5 to 8.

Table 1: *Description of the 25 socioeconomic indicators*

| Label | Description                                                                                                                                                                                                                                                                                                                                                                                                                                                                               |
|-------|-------------------------------------------------------------------------------------------------------------------------------------------------------------------------------------------------------------------------------------------------------------------------------------------------------------------------------------------------------------------------------------------------------------------------------------------------------------------------------------------|
| Life  | <i>Life expectancy at birth:</i> Life expectancy at birth indicates the number of years a newborn infant would live if prevailing patterns of mortality at the time of its birth were to stay the same throughout its life.                                                                                                                                                                                                                                                               |
| Pop   | <i>Population ages 0-14:</i> Population between the ages 0 to 14 as a percentage of the total population. The population is based on the de facto definition of population.                                                                                                                                                                                                                                                                                                               |
| Infa  | <i>Infant mortality rate:</i> Infant mortality rate is the number of infants dying before reaching one year of age, per 1,000 live births in a given year.                                                                                                                                                                                                                                                                                                                                |
| Sch1  | <i>School enrollment, primary:</i> Gross enrollment ratio is the ratio of total enrollment, regardless of age, to the population of the age group that officially corresponds to the level of education shown. Primary education provides children with basic reading, writing, and mathematics skills along with an elementary understanding of such subjects as history, geography, natural science, social science, art, and music.                                                    |
| Sch2  | <i>School enrollment, secondary:</i> Gross enrollment ratio is the ratio of total enrollment, regardless of age, to the population of the age group that officially corresponds to the level of education shown. Secondary education completes the provision of basic education that began at the primary level, and aims at laying the foundations for lifelong learning and human development, by offering more subject- or skill-oriented instruction using more specialized teachers. |

Table 2: *Description of the 25 socioeconomic indicators (cont.)*

| Label | Description                                                                                                                                                                                                                                                                                                                                                                                                      |
|-------|------------------------------------------------------------------------------------------------------------------------------------------------------------------------------------------------------------------------------------------------------------------------------------------------------------------------------------------------------------------------------------------------------------------|
| Sch3  | <i>School enrollment, tertiary:</i> Gross enrollment ratio is the ratio of total enrollment, regardless of age, to the population of the age group that officially corresponds to the level of education shown. Tertiary education, whether or not to an advanced research qualification, normally requires, as a minimum condition of admission, the successful completion of education at the secondary level. |
| Edu   | <i>Government expenditure on education:</i> General government expenditure on education (current, capital, and transfers) is expressed as a percentage of GDP. It includes expenditure funded by transfers from international sources to government. General government usually refers to local, regional and central governments.                                                                               |
| Gedu  | <i>Gross national expenditure:</i> Gross national expenditure (formerly domestic absorption) is the sum of household final consumption expenditure (formerly private consumption), general government final consumption expenditure (formerly general government consumption), and gross capital formation (formerly gross domestic investment).                                                                 |
| Rese  | <i>Research and development expenditure:</i> Gross domestic expenditures on research and development (R&D), expressed as a percent of GDP. They include both capital and current expenditures in the four main sectors: Business enterprise, Government, Higher education and Private non-profit. R&D covers basic research, applied research, and experimental development.                                     |

Table 3: *Description of the 25 socioeconomic indicators (cont.)*

| Label | Description                                                                                                                                                                                                                                                                                                                                                                                                                                                                                                                                                                                                                                                                               |
|-------|-------------------------------------------------------------------------------------------------------------------------------------------------------------------------------------------------------------------------------------------------------------------------------------------------------------------------------------------------------------------------------------------------------------------------------------------------------------------------------------------------------------------------------------------------------------------------------------------------------------------------------------------------------------------------------------------|
| GDP   | <i>GDP per capita:</i> GDP per capita based on purchasing power parity (PPP). PPP GDP is gross domestic product converted to international dollars using purchasing power parity rates. An international dollar has the same purchasing power over GDP as the U.S. dollar has in the United States. GDP at purchaser's prices is the sum of gross value added by all resident producers in the economy plus any product taxes and minus any subsidies not included in the value of the products. It is calculated without making deductions for depreciation of fabricated assets or for depletion and degradation of natural resources. Data are in constant 2011 international dollars. |
| Une   | <i>Unemployment:</i> Unemployment refers to the share of the labor force that is without work but available for and seeking employment. Definitions of labor force and unemployment differ by country.                                                                                                                                                                                                                                                                                                                                                                                                                                                                                    |
| Gsav  | <i>Gross savings:</i> Gross savings are calculated as gross national income less total consumption, plus net transfers.                                                                                                                                                                                                                                                                                                                                                                                                                                                                                                                                                                   |
| Ele   | <i>Access to electricity:</i> Access to electricity is the percentage of population with access to electricity. Electrification data are collected from industry, national surveys and international sources.                                                                                                                                                                                                                                                                                                                                                                                                                                                                             |
| Int   | <i>Individuals using the Internet:</i> Internet users are individuals who have used the Internet (from any location) in the last 3 months. The Internet can be used via a computer, mobile phone, personal digital assistant, games machine, digital TV etc..                                                                                                                                                                                                                                                                                                                                                                                                                             |

Table 4: *Description of the 25 socioeconomic indicators (cont.)*

| Label | Description                                                                                                                                                                                                                                                                                                                                                                                                                                                                                                                                                                                                                                                                                 |
|-------|---------------------------------------------------------------------------------------------------------------------------------------------------------------------------------------------------------------------------------------------------------------------------------------------------------------------------------------------------------------------------------------------------------------------------------------------------------------------------------------------------------------------------------------------------------------------------------------------------------------------------------------------------------------------------------------------|
| Ren   | <i>Renewable electricity output:</i> Renewable electricity is the share of electricity generated by renewable power plants in total electricity generated by all types of plants.                                                                                                                                                                                                                                                                                                                                                                                                                                                                                                           |
| Gini  | <i>GINI index:</i> The Gini index measures the extent to which the distribution of income (or, in some cases, consumption expenditure) among individuals or households within an economy deviates from a perfectly equal distribution. A Lorenz curve plots the cumulative percentages of total income received against the cumulative number of recipients, starting with the poorest individual or household. The Gini index measures the area between the Lorenz curve and a hypothetical line of absolute equality, expressed as a percentage of the maximum area under the line. Thus a Gini index of 0 represents perfect equality, while an index of 100 implies perfect inequality. |
| Trade | <i>Trade:</i> Trade is the sum of exports and imports of goods and services measured as a share of gross domestic product.                                                                                                                                                                                                                                                                                                                                                                                                                                                                                                                                                                  |

Table 5: *Description of the 25 socioeconomic indicators (cont.)*

| Label | Description                                                                                                                                                                                                                                                                                                                                                                                                                                                                                                                                                                                                 |
|-------|-------------------------------------------------------------------------------------------------------------------------------------------------------------------------------------------------------------------------------------------------------------------------------------------------------------------------------------------------------------------------------------------------------------------------------------------------------------------------------------------------------------------------------------------------------------------------------------------------------------|
| Saf   | <p><i>Coverage of social safety net programs in poorest quintile:</i> Coverage of social safety net programs shows the percentage of population participating in cash transfers and last resort programs, noncontributory social pensions, other cash transfers programs (such as child, family and orphan allowances), conditional cash transfers, in-kind food transfers (such as food stamps and vouchers, food rations), school feeding, other social assistance programs (housing allowances, scholarships, fee waivers, health subsidies, and other social assistance) and public works programs.</p> |
| Lit   | <p><i>Literacy rate:</i> Adult literacy rate is the percentage of people ages 15 and above who can both read and write with understanding a short simple statement about their everyday life.</p>                                                                                                                                                                                                                                                                                                                                                                                                           |
| Hea   | <p><i>Current health expenditure:</i> Level of current health expenditure expressed as a percentage of GDP. Estimates of current health expenditures include healthcare goods and services consumed during each year. This indicator does not include capital health expenditures such as buildings, machinery, IT and stocks of vaccines for emergencies or outbreaks.</p>                                                                                                                                                                                                                                 |
| Hyd   | <p><i>Electricity production from hydroelectric sources:</i> Sources of electricity refer to the inputs used to generate electricity. Hydropower refers to electricity produced by hydroelectric power plants.</p>                                                                                                                                                                                                                                                                                                                                                                                          |



Table 6: *Description of the 25 socioeconomic indicators (cont.)*

| Label | Description                                                                                                                                                                                                                                                                                                                                                                                                                                                                                                                    |
|-------|--------------------------------------------------------------------------------------------------------------------------------------------------------------------------------------------------------------------------------------------------------------------------------------------------------------------------------------------------------------------------------------------------------------------------------------------------------------------------------------------------------------------------------|
| Imp   | <i>Imports of goods and services:</i> Imports of goods and services represent the value of all goods and other market services received from the rest of the world. They include the value of merchandise, freight, insurance, transport, travel, royalties, license fees, and other services, such as communication, construction, financial, information, business, personal, and government services. They exclude compensation of employees and investment income (formerly called factor services) and transfer payments. |
| Comb  | <i>Combustible renewables and waste:</i> Combustible renewables and waste comprise solid biomass, liquid biomass, biogas, industrial waste, and municipal waste, measured as a percentage of total energy use.                                                                                                                                                                                                                                                                                                                 |
| Lab   | <i>Labor force participation rate:</i> Labor force participation rate is the proportion of the population ages 15 and older that is economically active: all people who supply labor for the production of goods and services during a specified period.                                                                                                                                                                                                                                                                       |
| Fert  | <i>Fertility rate:</i> Total fertility rate represents the number of children that would be born to a woman if she were to live to the end of her childbearing years and bear children in accordance with age-specific fertility rates of the specified year.                                                                                                                                                                                                                                                                  |

Table 7: *List of the 217 countries providing data for the World Development Indicators*

| Country name           |                    |                    |                        |
|------------------------|--------------------|--------------------|------------------------|
| Afghanistan            | Djibouti           | Lao PDR            | Rwanda                 |
| Albania                | Dominica           | Latvia             | Samoa                  |
| Algeria                | Dominican Republic | Lebanon            | San Marino             |
| American Samoa         | Ecuador            | Lesotho            | Sao Tome and Principe  |
| Andorra                | Egypt, Arab Rep.   | Liberia            | Saudi Arabia           |
| Angola                 | El Salvador        | Libya              | Senegal                |
| Antigua and Bar.       | Equatorial Gui.    | Liechtenstein      | Serbia                 |
| Argentina              | Eritrea            | Lithuania          | Seychelles             |
| Armenia                | Estonia            | Luxembourg         | Sierra Leone           |
| Aruba                  | Eswatini           | Macao SAR, China   | Singapore              |
| Australia              | Ethiopia           | Madagascar         | Sint Maarten (D)       |
| Austria                | Faroe Islands      | Malawi             | Slovak Republic        |
| Azerbaijan             | Fiji               | Malaysia           | Slovenia               |
| Bahamas, The           | Finland            | Maldives           | Solomon Islands        |
| Bahrain                | France             | Mali               | Somalia                |
| Bangladesh             | French Polynesia   | Malta              | South Africa           |
| Barbados               | Gabon              | Marshall Islands   | South Sudan            |
| Belarus                | Gambia, The        | Mauritania         | Spain                  |
| Belgium                | Georgia            | Mauritius          | Sri Lanka              |
| Belize                 | Germany            | Mexico             | St. Kitts and Nevis    |
| Benin                  | Ghana              | Micronesia, F. S.  | St. Lucia              |
| Bermuda                | Gibraltar          | Moldova            | St. Martin (F.)        |
| Bhutan                 | Greece             | Monaco             | St. Vincent and the G. |
| Bolivia                | Greenland          | Mongolia           | Sudan                  |
| Bosnia and Herzegovina | Grenada            | Montenegro         | Suriname               |
| Botswana               | Guam               | Morocco            | Sweden                 |
| Brazil                 | Guatemala          | Mozambique         | Switzerland            |
| British Virgin I.      | Guinea             | Myanmar            | Syrian Arab R.         |
| Brunei Dar.            | Guinea-Bissau      | Namibia            | Tajikistan             |
| Bulgaria               | Guyana             | Nauru              | Tanzania               |
| Burkina Faso           | Haiti              | Nepal              | Thailand               |
| Burundi                | Honduras           | Netherlands        | Timor-Leste            |
| Cabo Verde             | Hong Kong (SAR)    | New Caledonia      | Togo                   |
| Cambodia               | Hungary            | New Zealand        | Tonga                  |
| Cameroon               | Iceland            | Nicaragua          | Trinidad and Tobago    |
| Canada                 | India              | Niger              | Tunisia                |
| Cayman Islands         | Indonesia          | Nigeria            | Turkey                 |
| Central African Rep.   | Iran, Islamic Rep. | North Macedonia    | Turkmenistan           |
| Chad                   | Iraq               | Northern Mari. I.  | Turks and Caicos I.    |
| Channel Islands        | Ireland            | Norway             | Tuvalu                 |
| Chile                  | Isle of Man        | Oman               | Uganda                 |
| China                  | Israel             | Pakistan           | Ukraine                |
| Colombia               | Italy              | Palau              | United Arab E.         |
| Comoros                | Jamaica            | Panama             | United Kingdom         |
| Congo, Dem. Rep.       | Japan              | Papua New Guinea   | United States          |
| Congo, Rep.            | Jordan             | Paraguay           | Uruguay                |
| Costa Rica             | Kazakhstan         | Peru               | Uzbekistan             |
| Cote d'Ivoire          | Kenya              | Philippines        | Vanuatu                |
| Croatia                | Kiribati           | Poland             | Venezuela, RB          |
| Cuba                   | Korea, Dem. P. R.  | Portugal           | Vietnam                |
| Curacao                | Korea, Rep.        | Puerto Rico        | Virgin Islands (U.S.)  |
| Cyprus                 | Kosovo             | Qatar              | West Bank and Gaza     |
| Czech Republic         | Kuwait             | Romania            | Yemen, Rep.            |
| Denmark                | Kyrgyz Republic    | Russian Federation | Zambia                 |
| Zimbabwe               |                    |                    |                        |

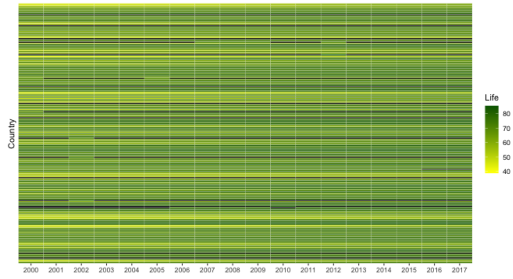

(a) Life expectancy at birth

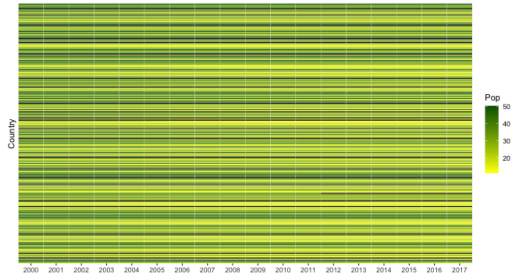

(b) Population ages 0-14

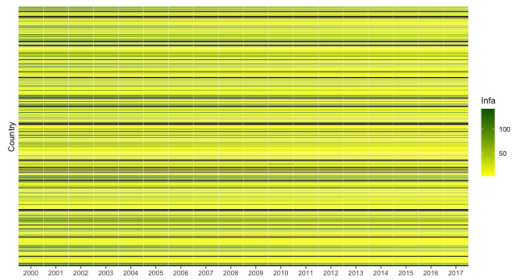

(c) Infant mortality rate

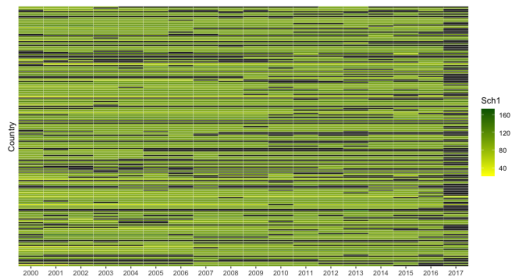

(d) School enrollment, primary

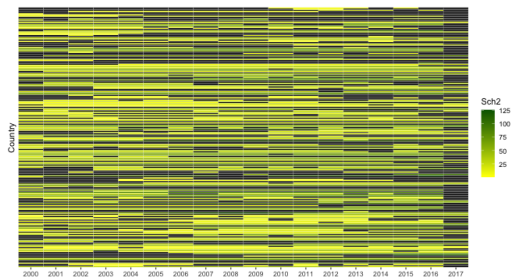

(e) School enrollment, secondary

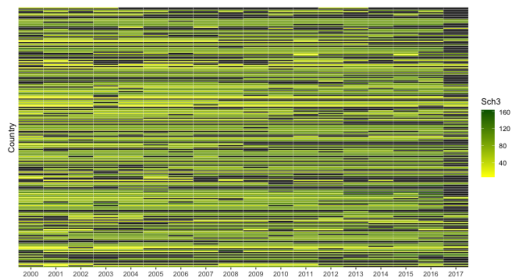

(f) School enrollment, tertiary

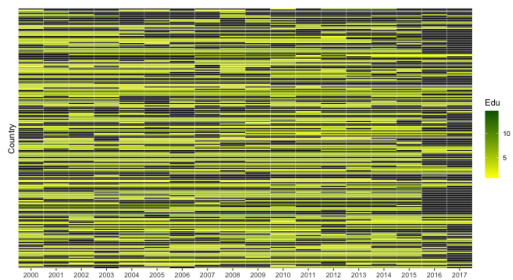

(g) Government expenditure on education

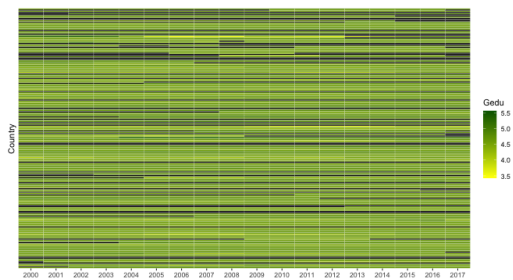

(h) Gross national expenditure

Figure 1: *Observed values of the 217 countries across time occasions from 2000 to 2017, missing values depicted in black*

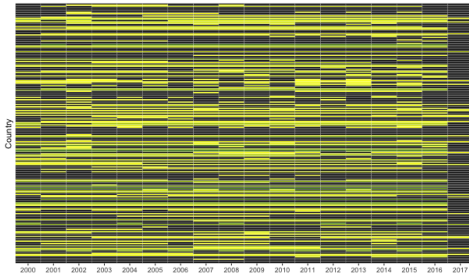

(a) Research and development expenditure

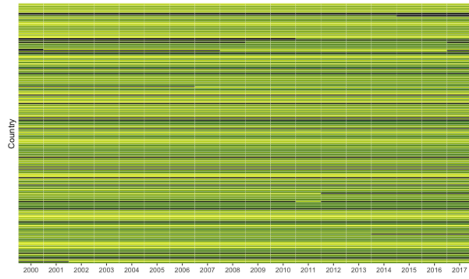

(b) GDP per capita

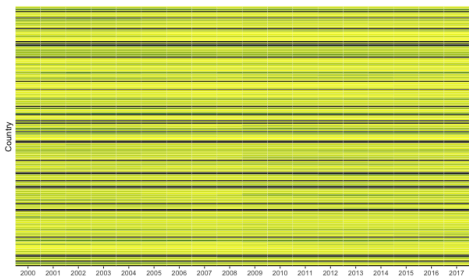

(c) Unemployment

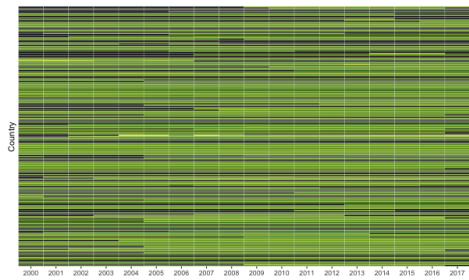

(d) Gross savings

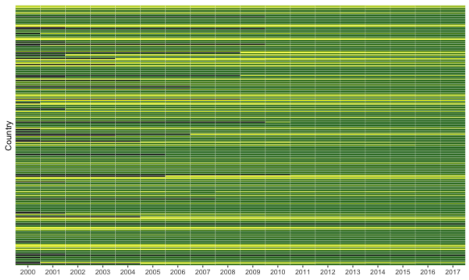

(e) Access to electricity

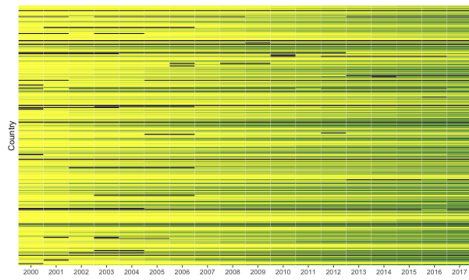

(f) Individuals using the Internet

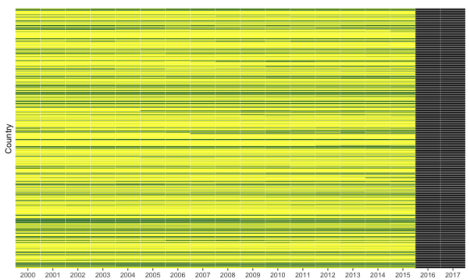

(g) Renewable electricity output

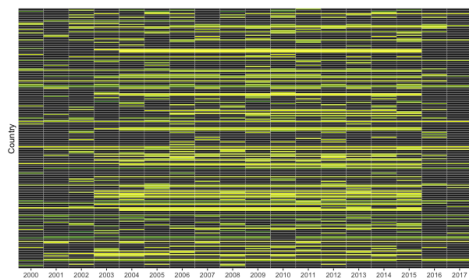

(h) GINI index

Figure 2: *Observed values of the 217 countries across time occasions from 2000 to 2017, missing values depicted in black*

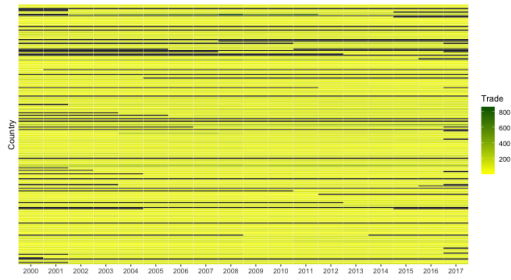

(a) Trade

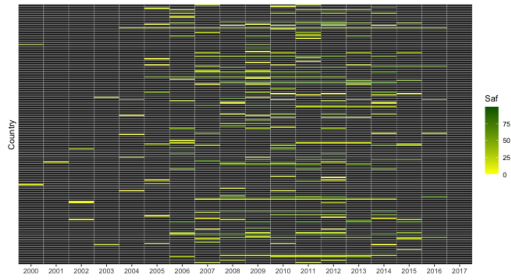

(b) Coverage of social safety net programs in poorest quintile

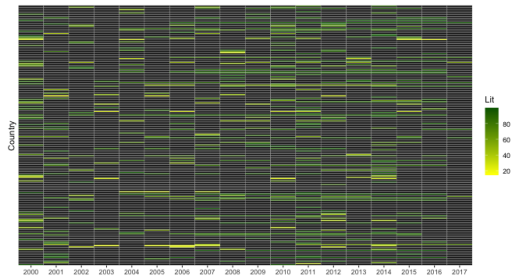

(c) Literacy rate

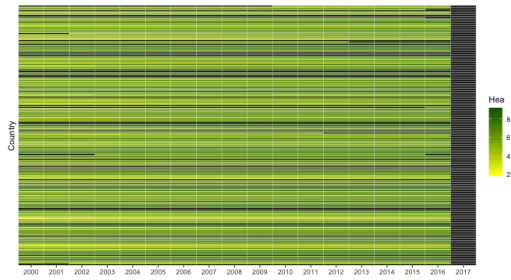

(d) Current health expenditure

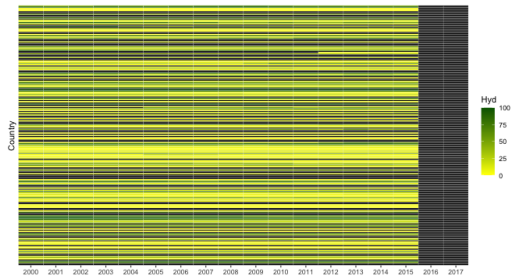

(e) Electricity production

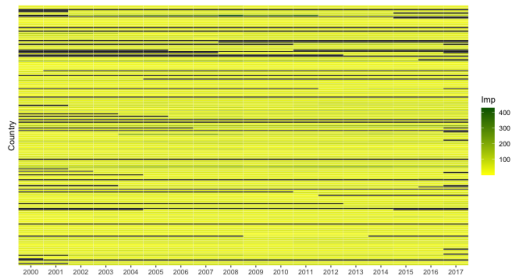

(f) Imports of goods and services

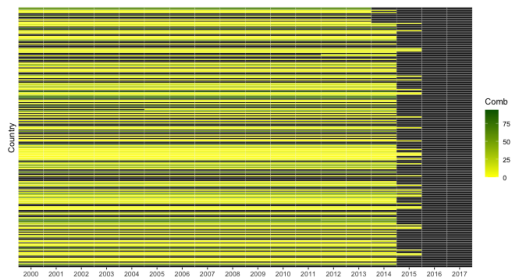

(g) Combustible renewables and waste

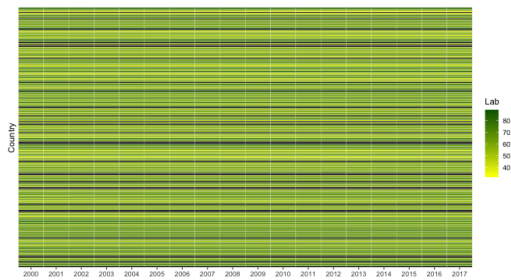

(h) Labor force participation rate

Figure 3: *Observed values of the 217 countries across time occasions from 2000 to 2017, missing values depicted in black*

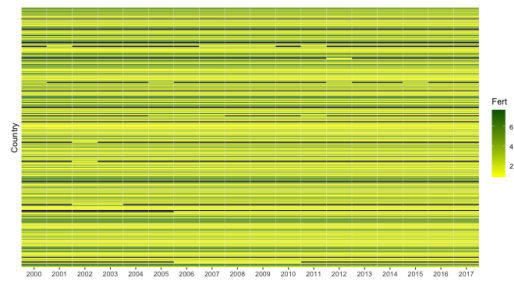

(a) Fertility rate

Figure 4: *Observed values of the 217 countries across time occasions from 2000 to 2017, missing values depicted in black*

Table 8: *Summary statistics of 15 indicators collected in 2000*

| Summary | Ele     | GDP        | Hea      | Life   | Gsav    | Imp     | Sch3   | Rese  |
|---------|---------|------------|----------|--------|---------|---------|--------|-------|
| Min.    | 2.845   | 572.813    | 6.596    | 38.702 | -27.661 | 0.627   | 0.269  | 0.045 |
| 1st Qu. | 55.523  | 2930.057   | 103.714  | 60.382 | 14.897  | 27.206  | 5.589  | 0.239 |
| Median  | 97.919  | 7938.751   | 307.694  | 70.315 | 20.773  | 38.980  | 21.861 | 0.542 |
| 3rd Qu. | 100.000 | 20782.434  | 788.947  | 74.413 | 27.221  | 55.290  | 41.146 | 1.174 |
| Max.    | 100.000 | 108287.154 | 4559.888 | 81.076 | 50.650  | 176.014 | 82.330 | 3.933 |
| Sd      | 33.055  | 19350.563  | 828.023  | 9.985  | 10.777  | 25.604  | 20.843 | 0.869 |
| NA's    | 41      | 27         | 33       | 16     | 86      | 41      | 103    | 145   |

  

| Summary | Trade   | Edu    | Sch1    | Int    | Sch2    | Saf    | Lit    |
|---------|---------|--------|---------|--------|---------|--------|--------|
| Min.    | 1.166   | 1.012  | 21.872  | 0.000  | 6.112   | 4.616  | 25.654 |
| 1st Qu. | 52.424  | 2.974  | 96.387  | 0.380  | 43.836  | 15.244 | 63.117 |
| Median  | 74.630  | 4.116  | 101.636 | 2.460  | 77.870  | 25.872 | 86.254 |
| 3rd Qu. | 104.789 | 5.301  | 107.273 | 9.515  | 93.085  | 36.501 | 92.623 |
| Max.    | 364.365 | 11.186 | 134.029 | 52.000 | 151.851 | 47.129 | 99.767 |
| Sd      | 49.148  | 1.934  | 17.901  | 13.309 | 31.695  | 30.061 | 19.832 |
| NA's    | 41      | 97     | 55      | 21     | 78      | 215    | 174    |

Table 9: *Summary statistics of 15 indicators collected in 2017*

| Summary | Ele     | GDP        | Hea | Life   | Gsav    | Imp     | Sch3    | Rese  |
|---------|---------|------------|-----|--------|---------|---------|---------|-------|
| Min.    | 9.300   | 670.777    | -   | 52.214 | -48.782 | 11.571  | 4.018   | 0.015 |
| 1st Qu. | 80.569  | 4452.428   | -   | 66.894 | 14.845  | 31.072  | 17.954  | 0.131 |
| Median  | 100.000 | 12333.663  | -   | 74.300 | 22.084  | 43.270  | 37.210  | 0.225 |
| 3rd Qu. | 100.000 | 27512.682  | -   | 77.738 | 28.211  | 60.162  | 58.059  | 0.470 |
| Max     | 100.000 | 113262.182 | -   | 84.680 | 55.640  | 189.789 | 113.769 | 1.530 |
| Sd      | 24.786  | 20462.594  | -   | 7.729  | 11.328  | 26.901  | 26.865  | 0.345 |
| NA's    | 2       | 26         | 217 | 18     | 67      | 39      | 151     | 193   |

  

| Summary | Trade   | Edu   | Sch1    | Int    | Sch2    | Saf | Lit    |
|---------|---------|-------|---------|--------|---------|-----|--------|
| Min.    | 21.507  | 0.981 | 49.422  | 1.309  | 17.546  | -   | 51.900 |
| 1st Qu. | 56.658  | 3.201 | 98.638  | 29.198 | 54.987  | -   | 76.790 |
| Median  | 78.403  | 4.349 | 102.070 | 58.317 | 85.838  | -   | 92.143 |
| 3rd Qu. | 111.520 | 5.246 | 107.857 | 78.914 | 98.573  | -   | 95.564 |
| Max.    | 412.869 | 7.432 | 139.945 | 98.871 | 150.989 | -   | 98.616 |
| Sd      | 55.118  | 1.561 | 12.596  | 28.381 | 27.245  | -   | 15.132 |
| NA's    | 39      | 162   | 120     | 13     | 135     | 217 | 207    |



Table 10: *Overall median of 15 indicators in 2017 (in italic), and observed values for 8 countries*

| Countries             | Ele           | GDP              | Hea            | Life          | Gsav          | Imp           | Sch3          | Rese         |
|-----------------------|---------------|------------------|----------------|---------------|---------------|---------------|---------------|--------------|
| <i>Overall median</i> | <i>100</i>    | <i>12333.663</i> |                | <i>74.300</i> | <i>22.084</i> | <i>43.270</i> | <i>37.210</i> | <i>0.224</i> |
| Afghanistan           | 97.701        | 1758.466         | -              | 64.047        | 20.791        | 45.332        | -             | -            |
| Bhutan                | 97.700        | 9246.677         | -              | 70.565        | 29.396        | 49.553        | -             | -            |
| Cambodia              | 89.070        | 3653.641         | -              | 69.331        | 23.193        | 64.106        | 13.138        | -            |
| Ethiopia              | 44.301        | 1724.483         | -              | 65.874        | 30.820        | 23.477        | -             | -            |
| Nepal                 | 95.507        | 2605.510         | -              | 70.604        | 45.624        | 42.887        | 11.793        | -            |
| Papua New Guinea      | 54.427        | 3880.650         | -              | 65.705        | -             | -             | -             | -            |
| Solomon Islands       | 62.895        | 2126.353         | -              | 71.006        | -             | -             | -             | -            |
| Timor-Leste           | 80.381        | 6740.890         | -              | 69.199        | 12.300        | 59.916        | -             | -            |
| Countries             | Trade         | Edu              | Sch1           | Int           | Sch2          | Saf           | Lit           |              |
| <i>Overall median</i> | <i>78.403</i> | <i>4.349</i>     | <i>102.069</i> | <i>58.317</i> | <i>85.838</i> | -             | <i>92.142</i> |              |
| Afghanistan           | 51.237        | 3.927            | 103.924        | 11.448        | 54.813        | -             | -             |              |
| Bhutan                | 78.645        | 7.050            | 92.575         | 48.106        | 86.096        | -             | -             |              |
| Cambodia              | 124.788       | -                | 107.835        | 34.000        | -             | -             | -             |              |
| Ethiopia              | 31.107        | -                | -              | 18.618        | -             | -             | -             |              |
| Nepal                 | 51.983        | 5.096            | 134.121        | 21.403        | 71.209        | -             | -             |              |
| Papua New Guinea      | -             | -                | -              | 11.209        | -             | -             | -             |              |
| Solomon Islands       | -             | -                | 114.351        | 11.924        | -             | -             | -             |              |
| Timor-Leste           | 121.005       | -                | 100.583        | 27.493        | 79.303        | -             | -             |              |

Table 11: *Standard errors obtained with the non-parametric bootstrap for the estimated transition probabilities from 2000 to 2001 under the HM model with  $k = 6$  hidden states*

|                           | 1     | 2     | 3     | 4     | 5     | 6     |
|---------------------------|-------|-------|-------|-------|-------|-------|
| $se(\widehat{\pi}_{u 1})$ | 0.045 | 0.005 | -     | -     | -     | -     |
| $se(\widehat{\pi}_{u 2})$ | 0.003 | 0.033 | 0.001 | -     | -     | -     |
| $se(\widehat{\pi}_{u 3})$ | -     | -     | 0.047 | 0.043 | -     | 0.002 |
| $se(\widehat{\pi}_{u 4})$ | -     | -     | -     | 0.008 | -     | -     |
| $se(\widehat{\pi}_{u 5})$ | -     | -     | 0.003 | 0.004 | 0.035 | -     |
| $se(\widehat{\pi}_{u 6})$ | -     | -     | -     | -     | -     | 0.001 |

Table 12: *Standard errors obtained with the non-parametric bootstrap for the estimated transition probabilities from 2005 to 2006 under the HM model with  $k = 6$  hidden states*

|                           | 1     | 2     | 3     | 4     | 5     | 6     |
|---------------------------|-------|-------|-------|-------|-------|-------|
| $se(\widehat{\pi}_{u 1})$ | 0.032 | -     | -     | -     | -     | -     |
| $se(\widehat{\pi}_{u 2})$ | -     | 0.005 | -     | -     | -     | -     |
| $se(\widehat{\pi}_{u 3})$ | -     | -     | 0.053 | 0.005 | 0.005 | -     |
| $se(\widehat{\pi}_{u 4})$ | -     | -     | -     | 0.060 | 0.005 | -     |
| $se(\widehat{\pi}_{u 5})$ | -     | -     | -     | -     | 0.035 | -     |
| $se(\widehat{\pi}_{u 6})$ | -     | -     | -     | -     | -     | 0.001 |

Table 13: *Standard errors obtained with the non-parametric bootstrap for the estimated transition probabilities from 2010 to 2011 under the HM model with  $k = 6$  hidden states*

|                           | 1     | 2     | 3     | 4     | 5     | 6     |
|---------------------------|-------|-------|-------|-------|-------|-------|
| $se(\widehat{\pi}_{u 1})$ | 0.072 | -     | -     | -     | -     | -     |
| $se(\widehat{\pi}_{u 2})$ | 0.037 | 0.062 | 0.053 | -     | -     | -     |
| $se(\widehat{\pi}_{u 3})$ | -     | -     | 0.055 | 0.004 | -     | 0.004 |
| $se(\widehat{\pi}_{u 4})$ | -     | -     | -     | 0.082 | -     | 0.008 |
| $se(\widehat{\pi}_{u 5})$ | -     | -     | -     | -     | 0.012 | -     |
| $se(\widehat{\pi}_{u 6})$ | -     | -     | -     | -     | -     | 0.001 |

Table 14: *Standard errors obtained with the non-parametric bootstrap for the estimated transition probabilities from 2016 to 2017 under the HM model with  $k = 6$  hidden states*

|                           | 1     | 2     | 3     | 4     | 5     | 6     |
|---------------------------|-------|-------|-------|-------|-------|-------|
| $se(\widehat{\pi}_{u 1})$ | 0.001 | -     | -     | -     | -     | -     |
| $se(\widehat{\pi}_{u 2})$ | -     | 0.035 | -     | -     | -     | -     |
| $se(\widehat{\pi}_{u 3})$ | -     | -     | 0.053 | -     | -     | -     |
| $se(\widehat{\pi}_{u 4})$ | -     | -     | -     | 0.104 | -     | 0.161 |
| $se(\widehat{\pi}_{u 5})$ | -     | -     | -     | 0.025 | 0.025 | -     |
| $se(\widehat{\pi}_{u 6})$ | -     | -     | -     | -     | -     | 0.001 |

## References

Box, G. E. and Cox, D. R. (1964). An analysis of transformations. *Journal of the Royal Statistical Society, Series B*, 26:211–243.

Davison, A. C. and Hinkley, D. V. (1997). *Bootstrap Methods and their Application*. Cambridge University Press, Cambridge, MA.
